# Supplementary material for: Models of microglia depletion and replenishment elicit protective effects to alleviate vascular and neuronal damage in the diabetic murine retina
Source: Springer Nature journal article supplement (doi:10.1186/s12974-022-02659-9), 2022-12-14

# Supplementary Figure 1

A

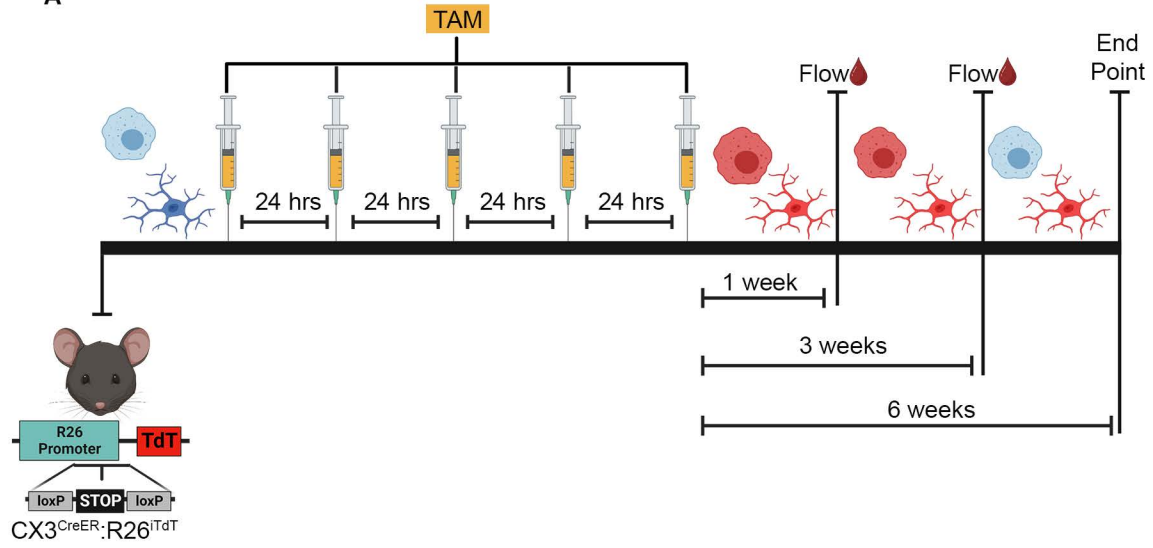

B

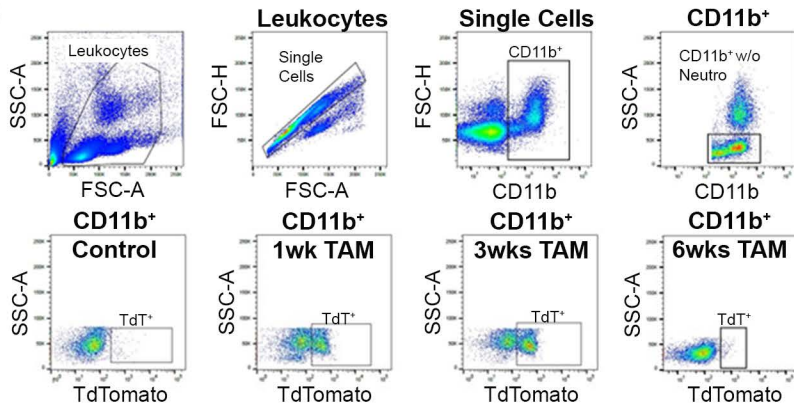

C

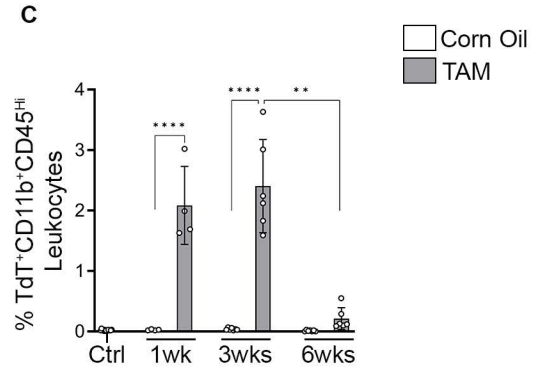

D

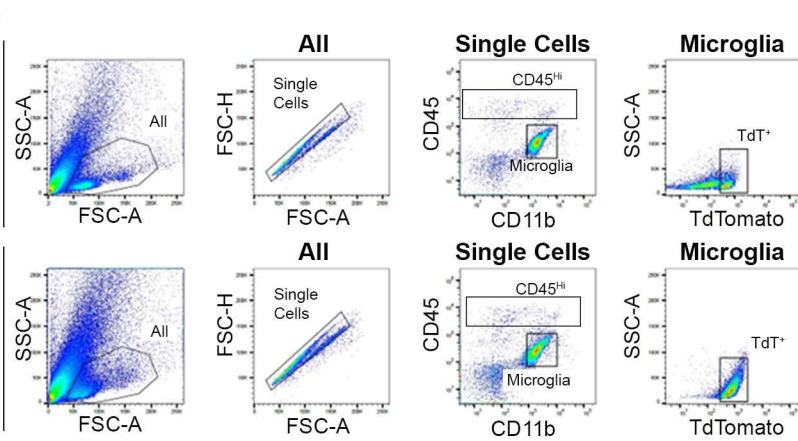

E

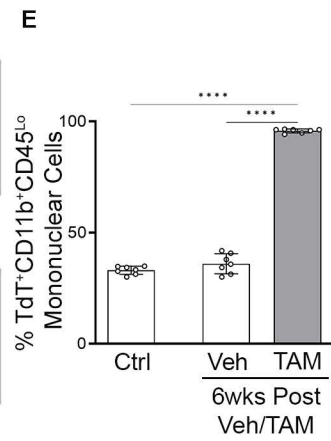

F

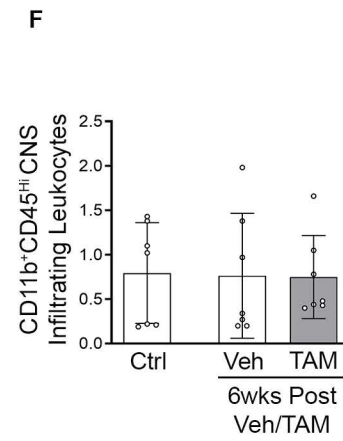

# Supplementary Figure 2

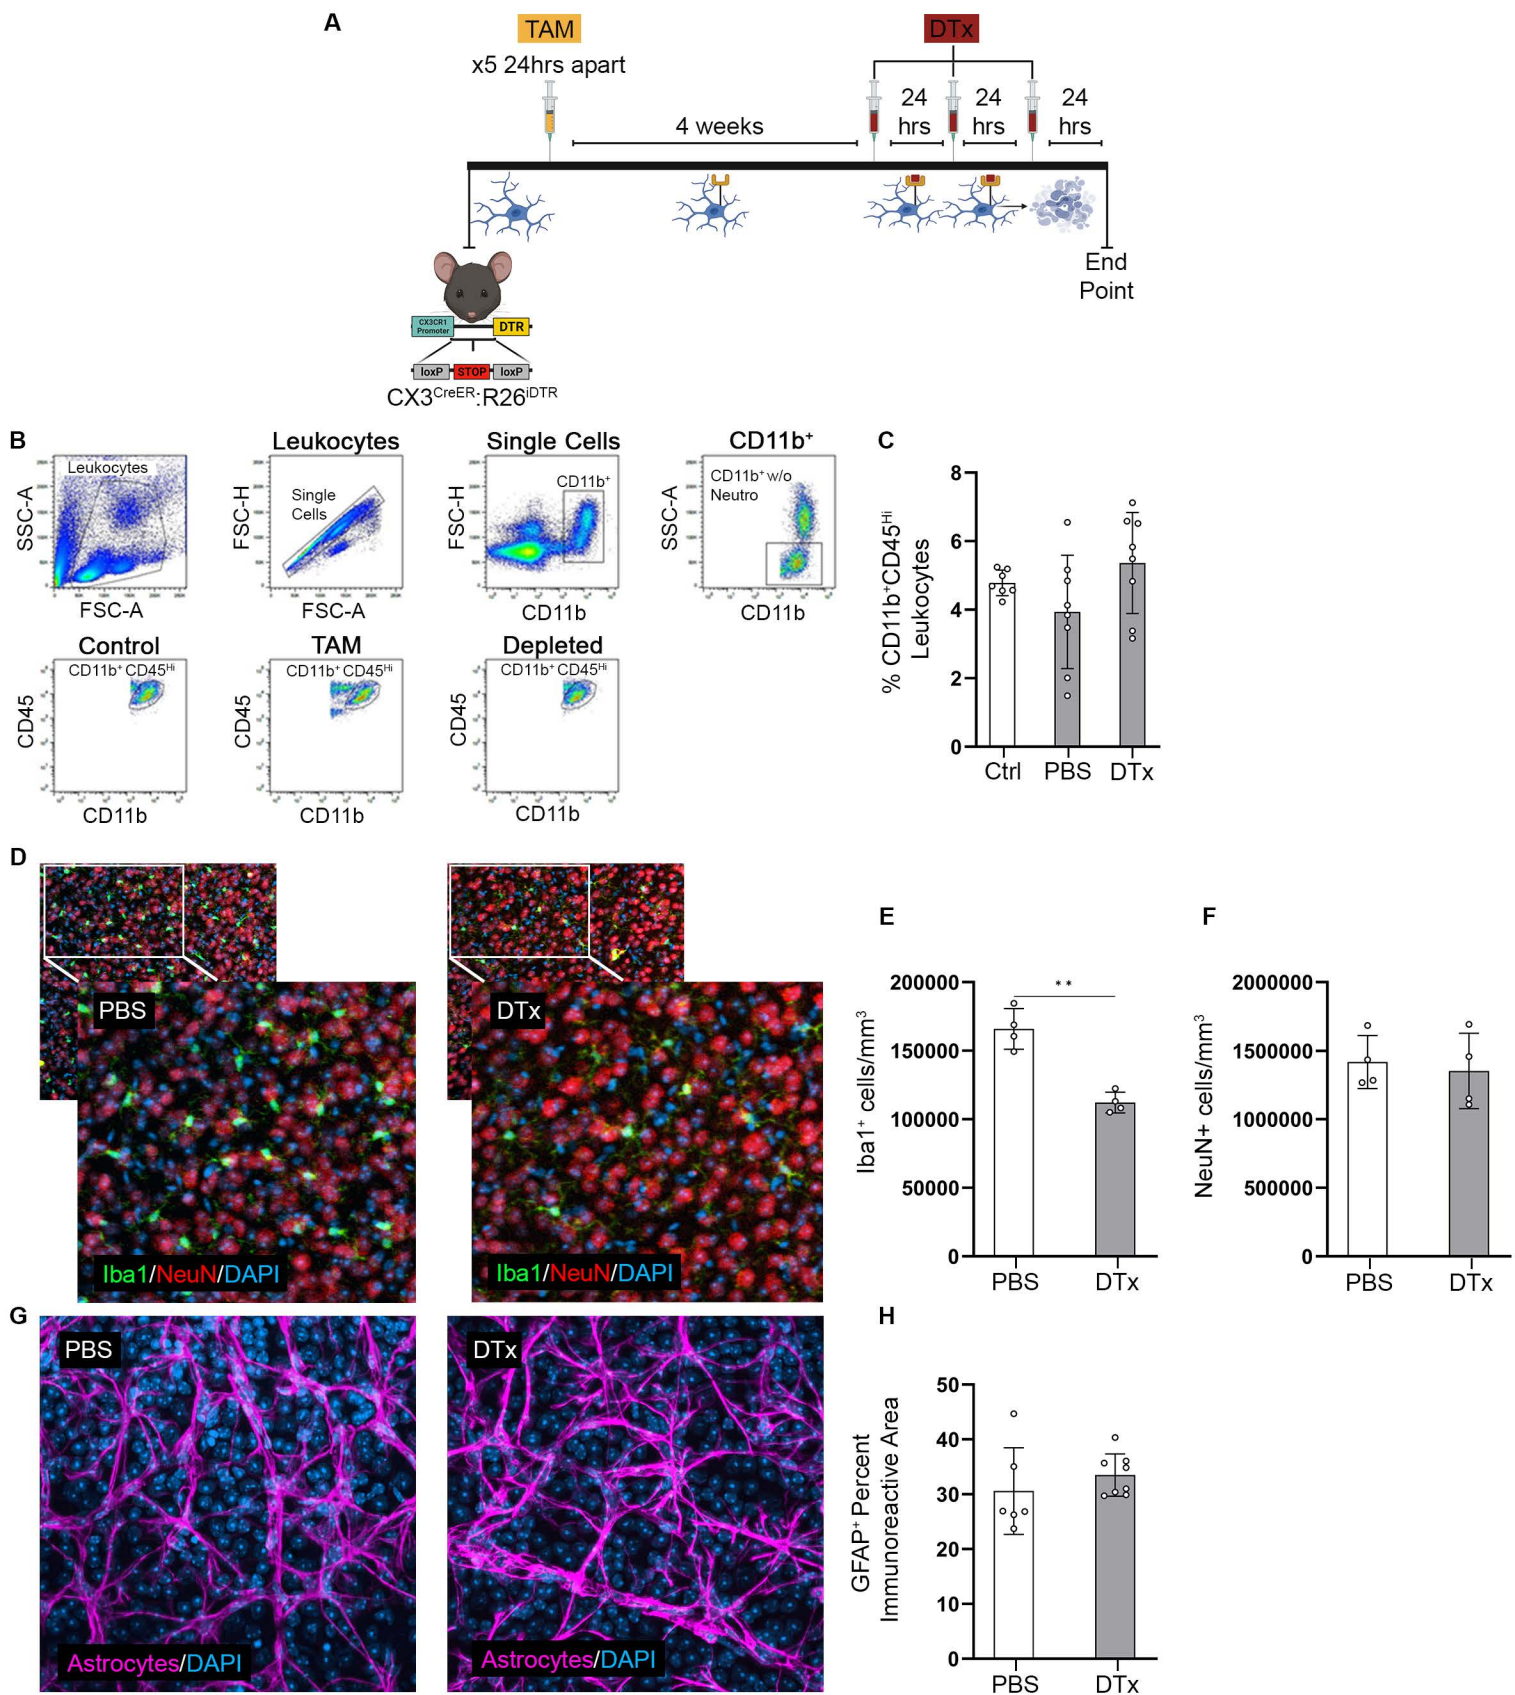

# Supplementary Figure 3

## A Blood Gating Strategy

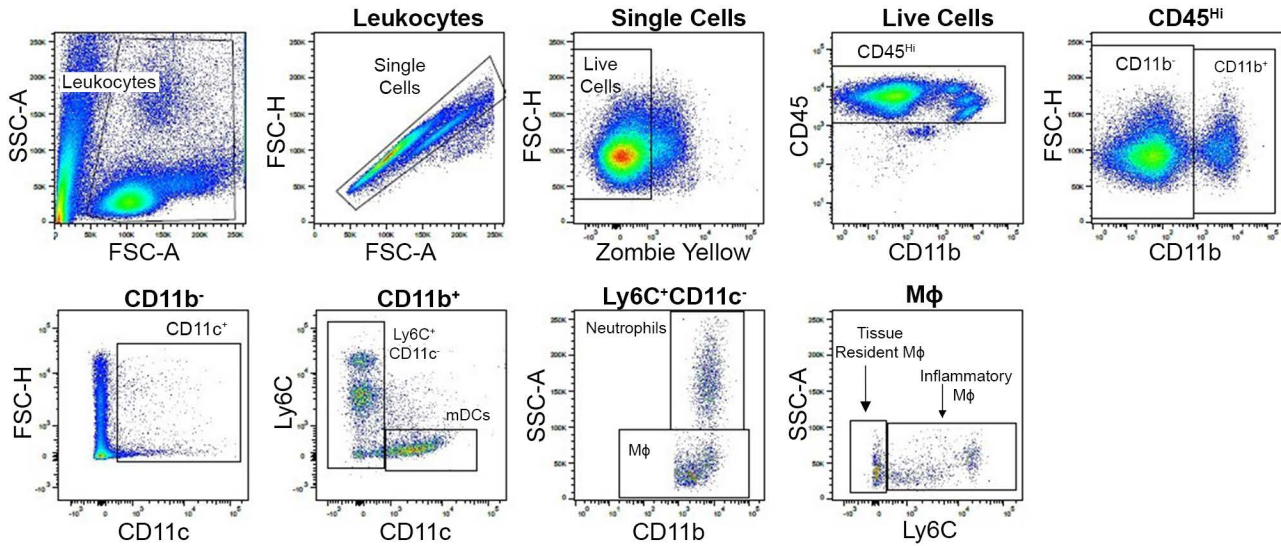

## B Serum Bio-Plex Cytokine 23-plex

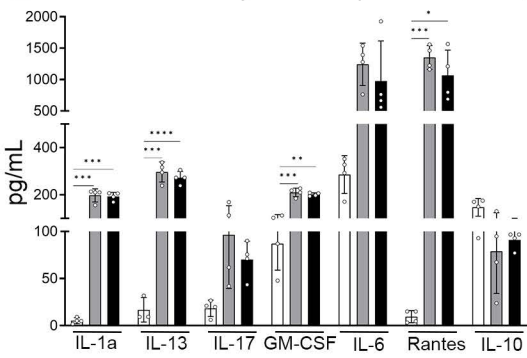

## C

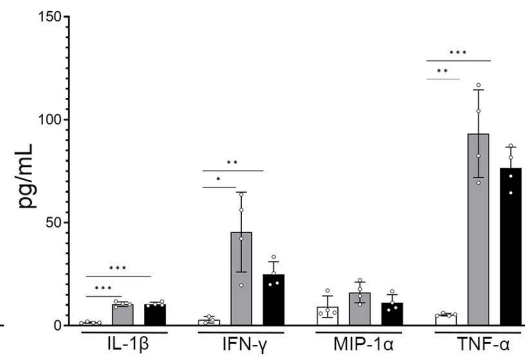

## D

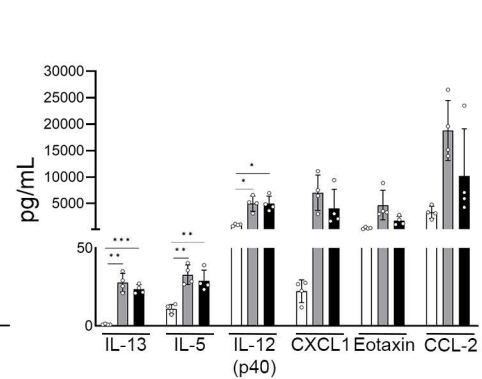

## E CNS Gating Strategy

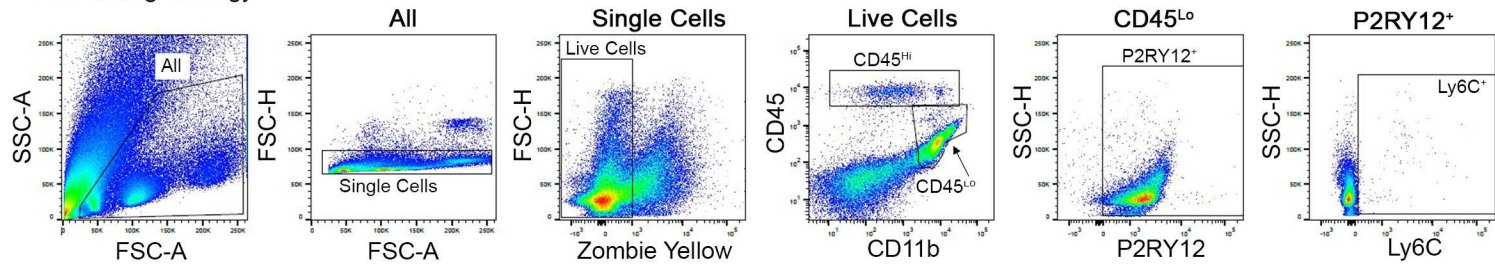

## F

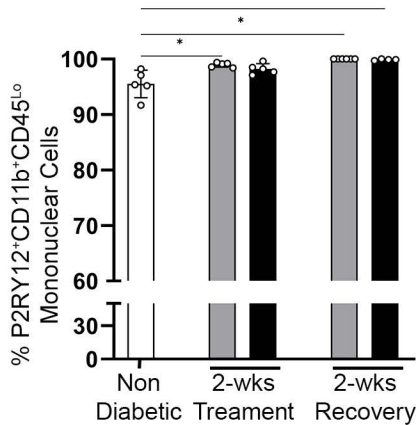

## G

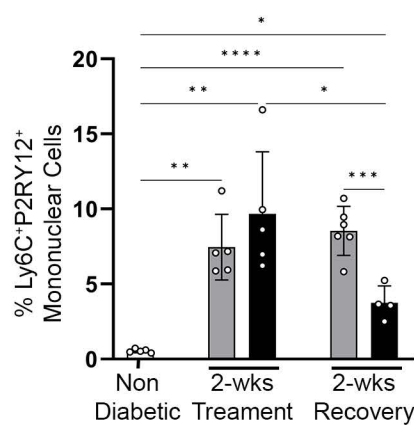

## H

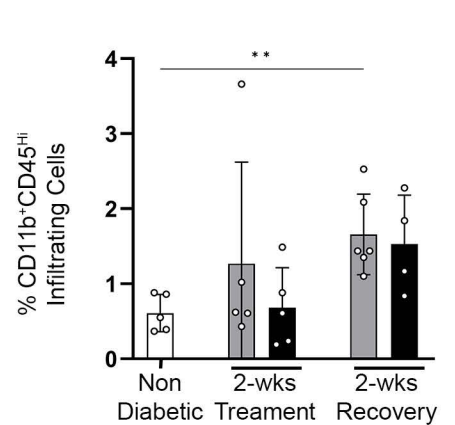

Non-diabetic PBS
  Diabetic PBS
  Diabetic DTx

# Supplementary Figure 4

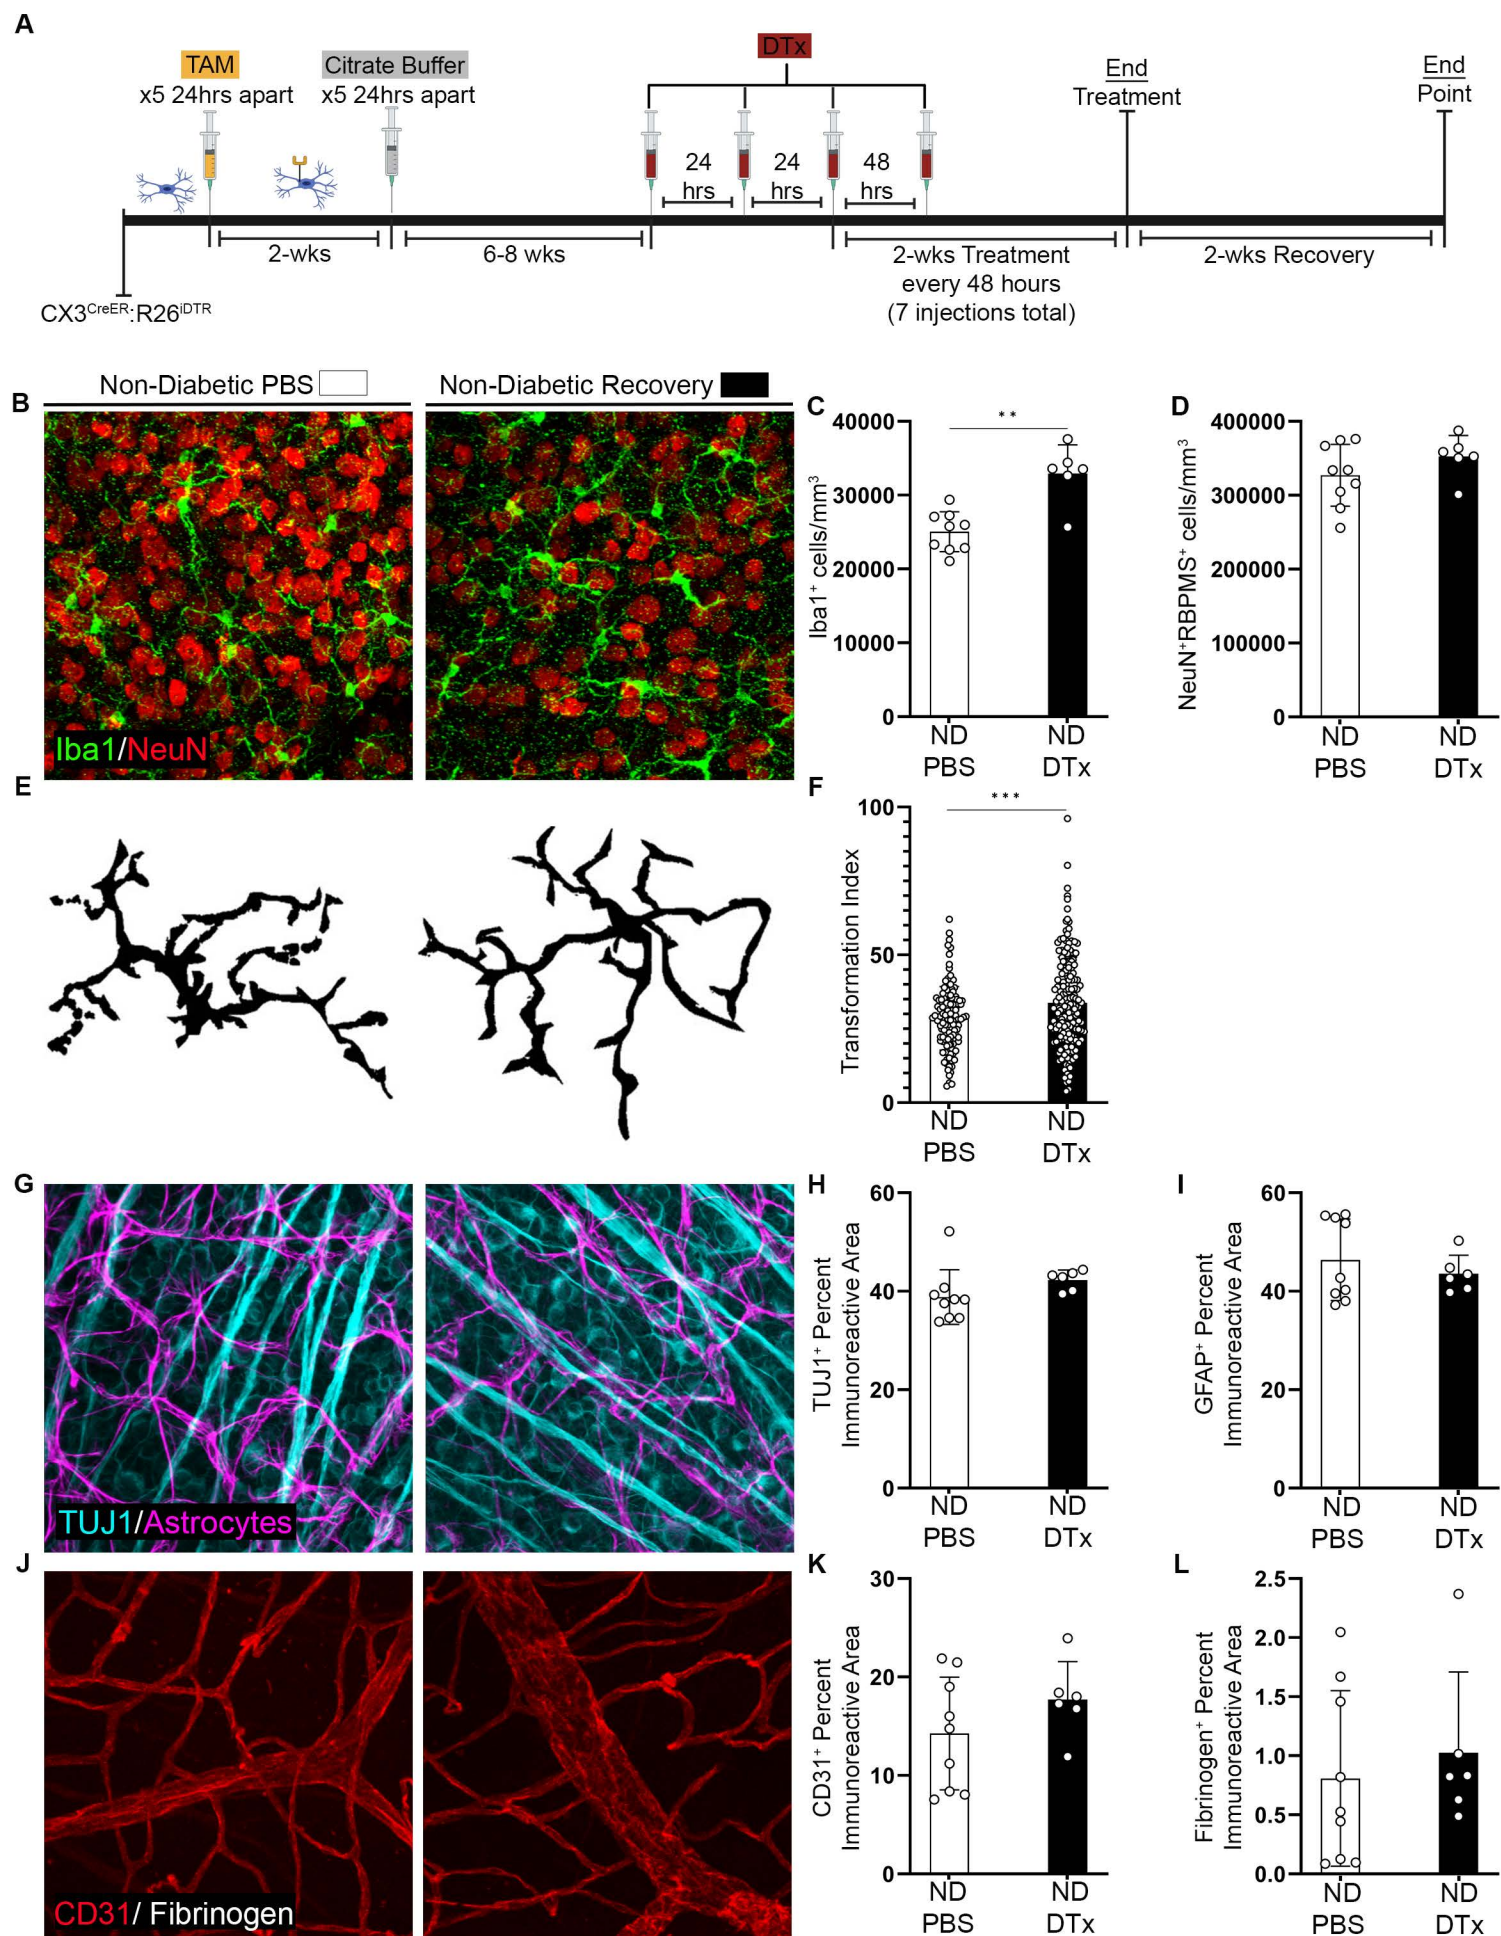

# Supplementary Figure 5

A

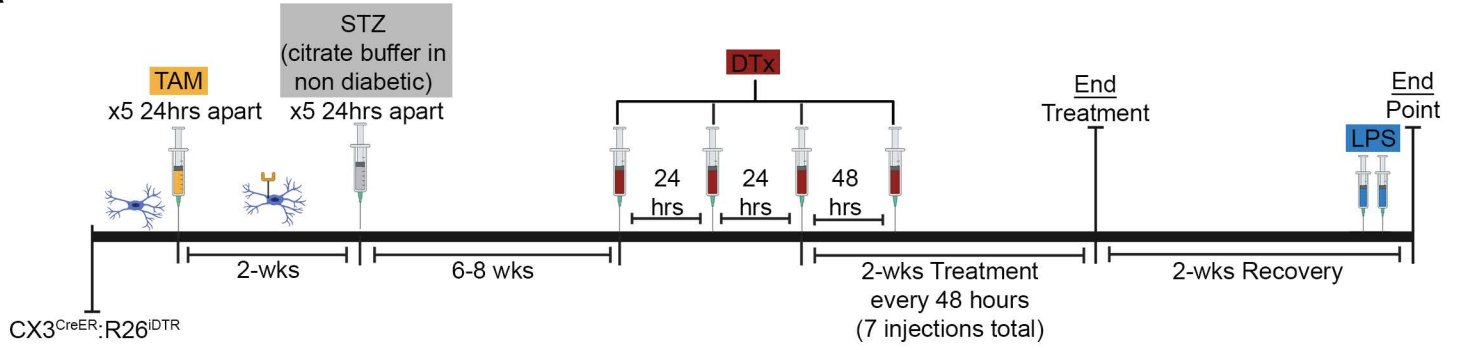

B

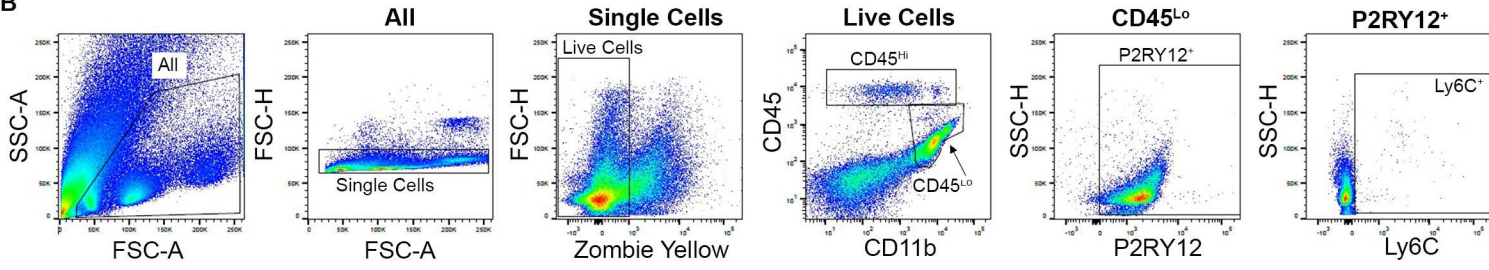

C

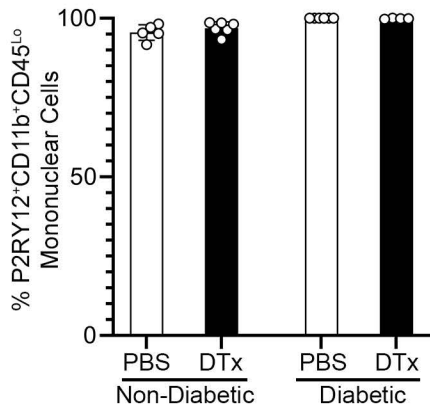

D

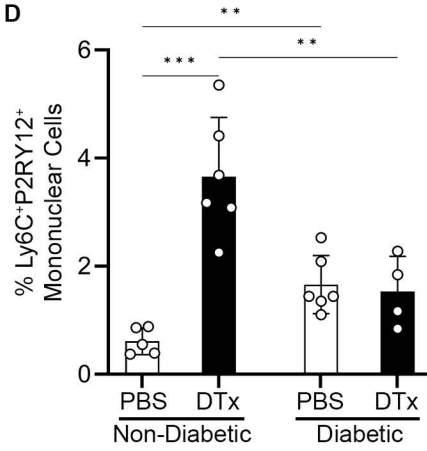

E

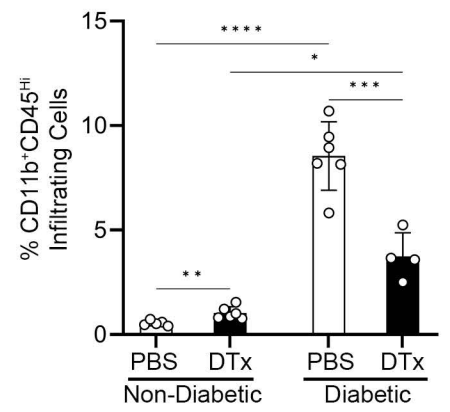

# Supplementary Figure 6

A

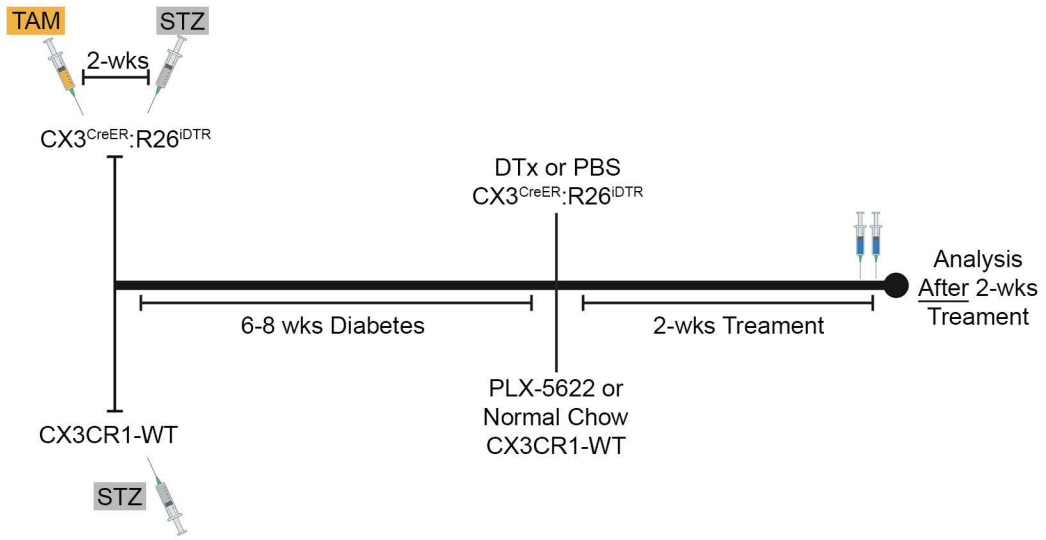

B

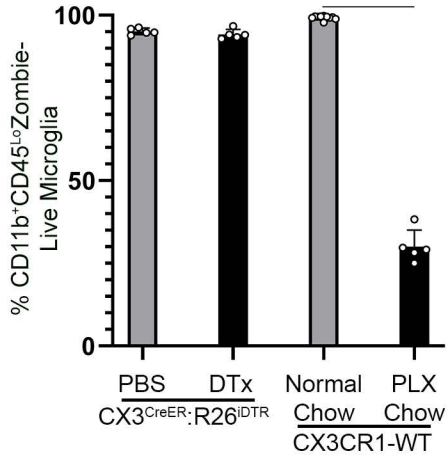

C

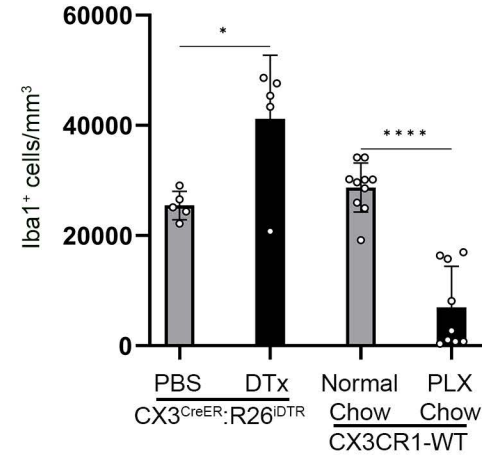

D

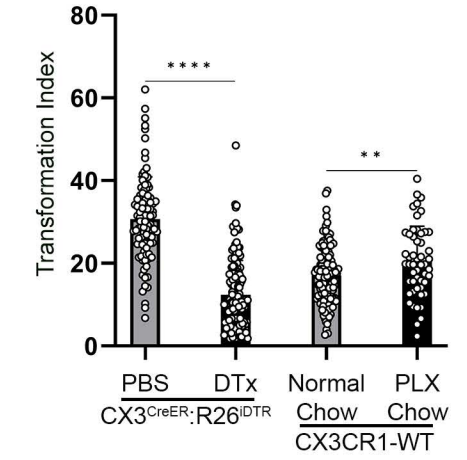

# Supplementary Figure 7

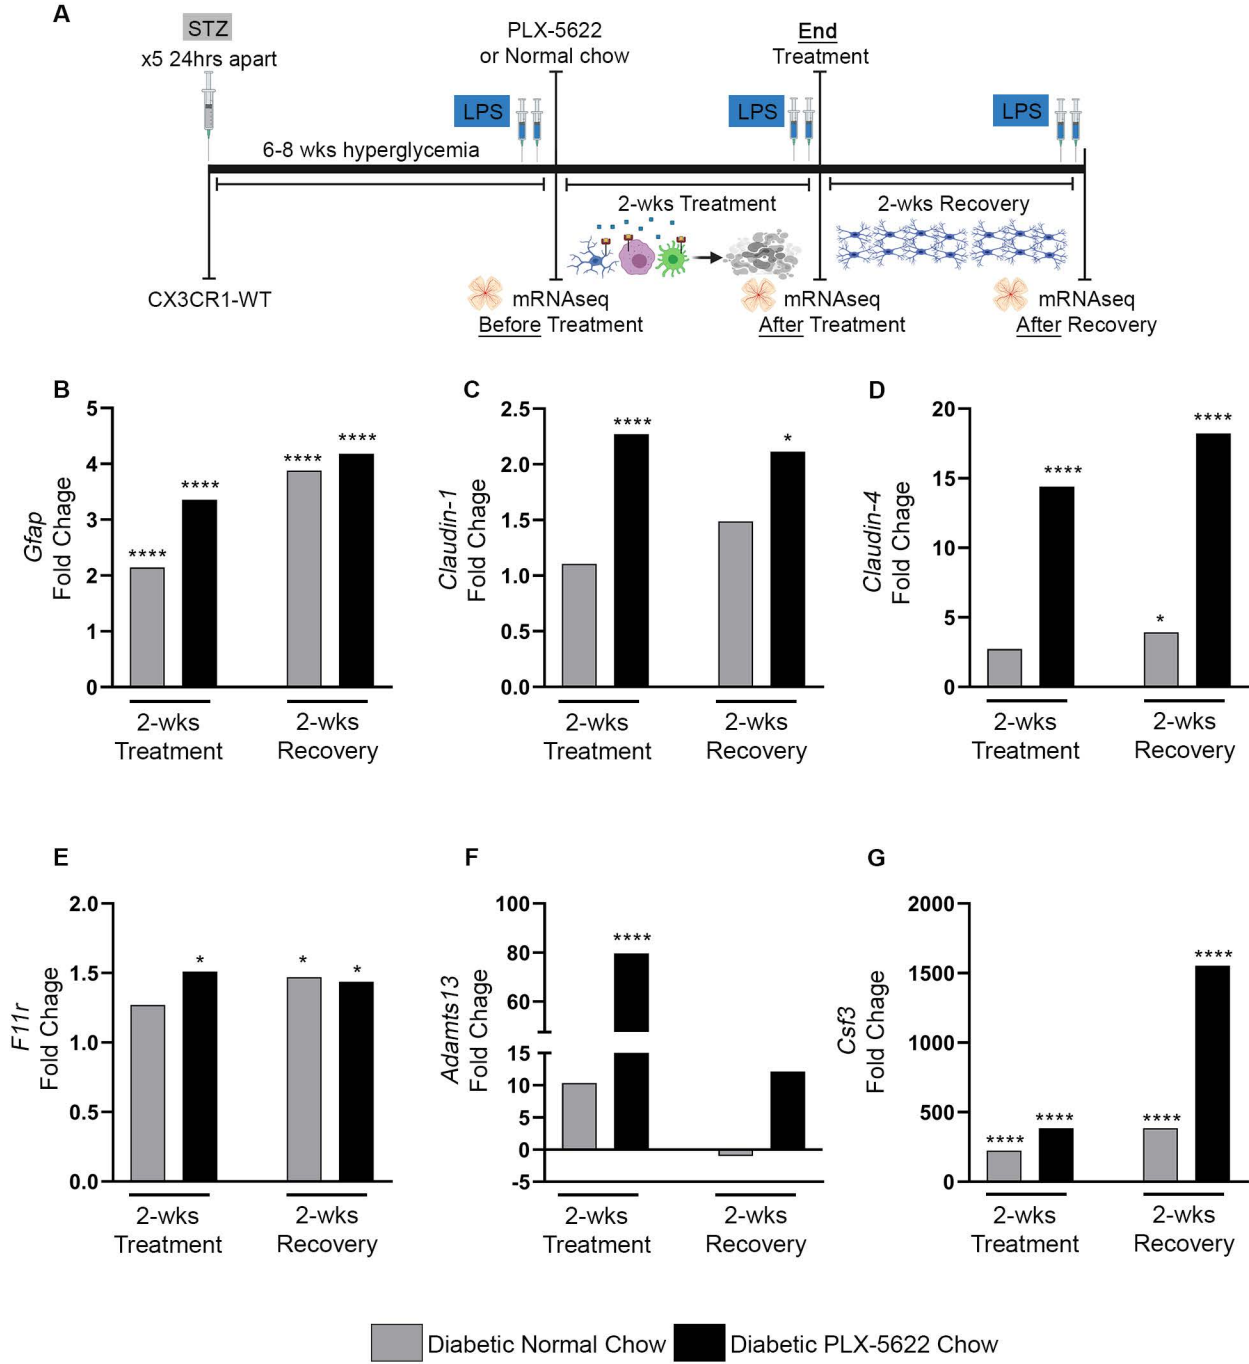

# Supplementary Figure 8

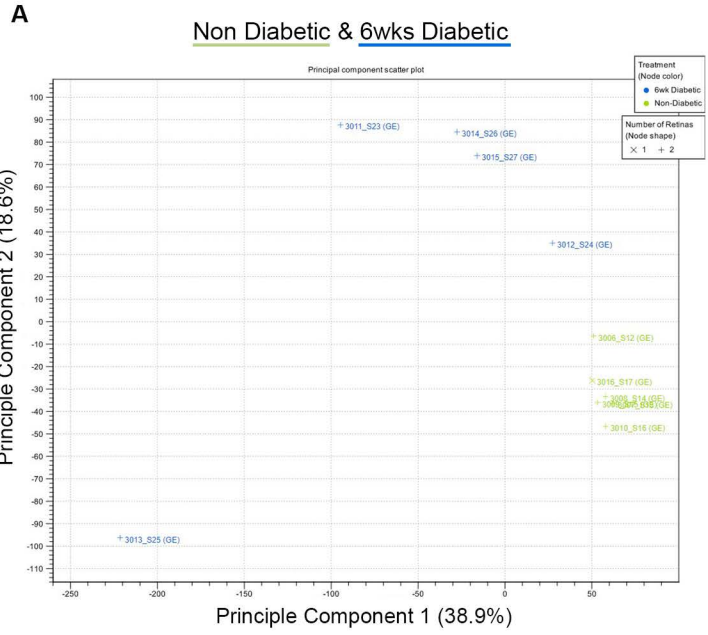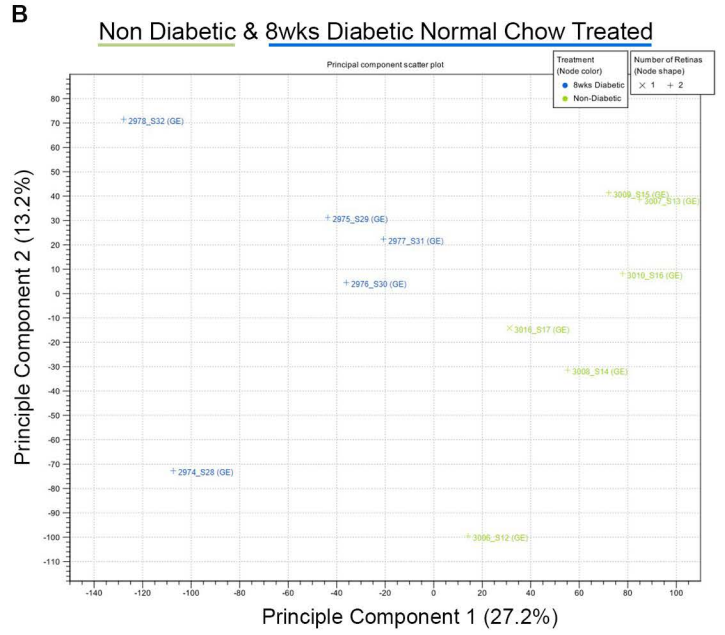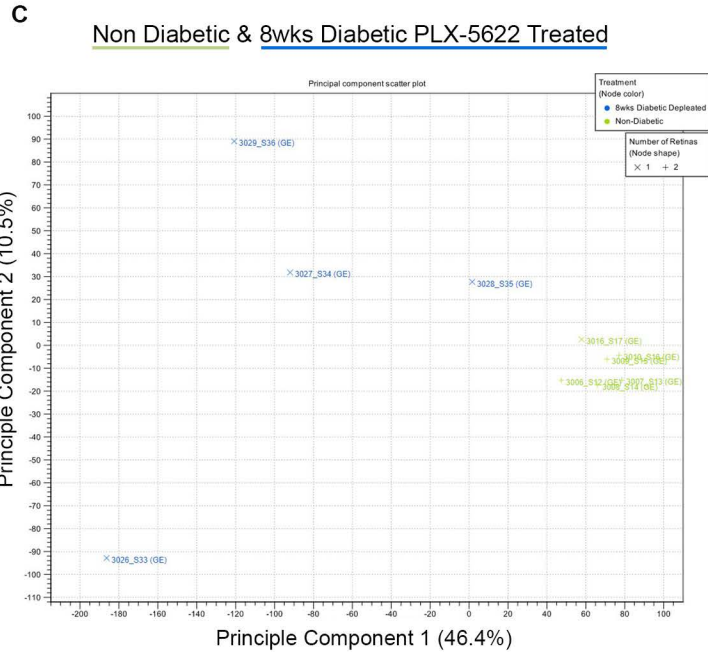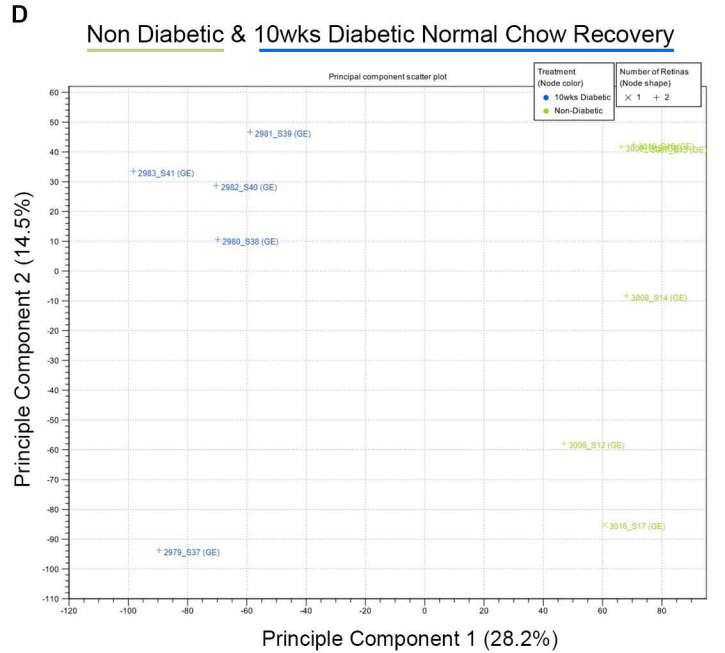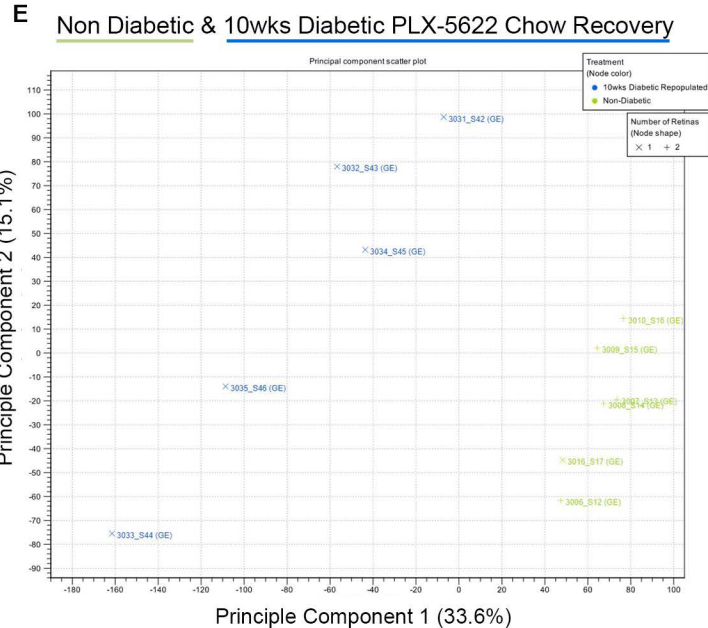



# Supplementary Figure 9

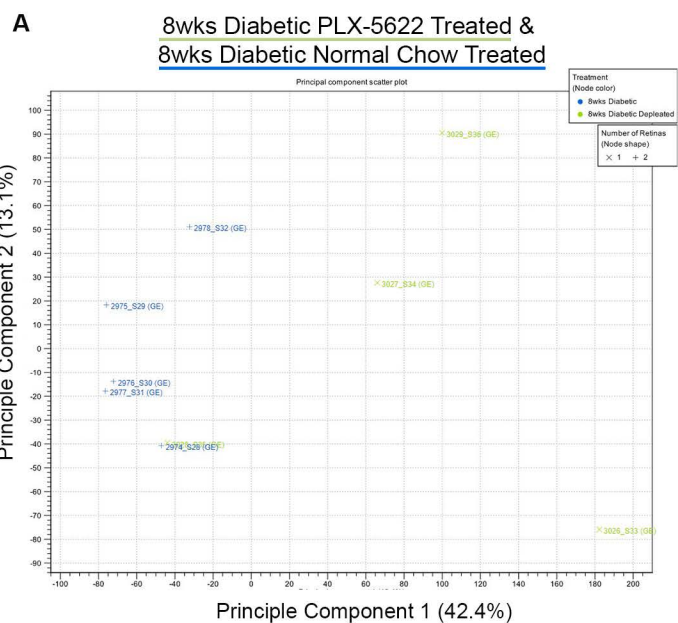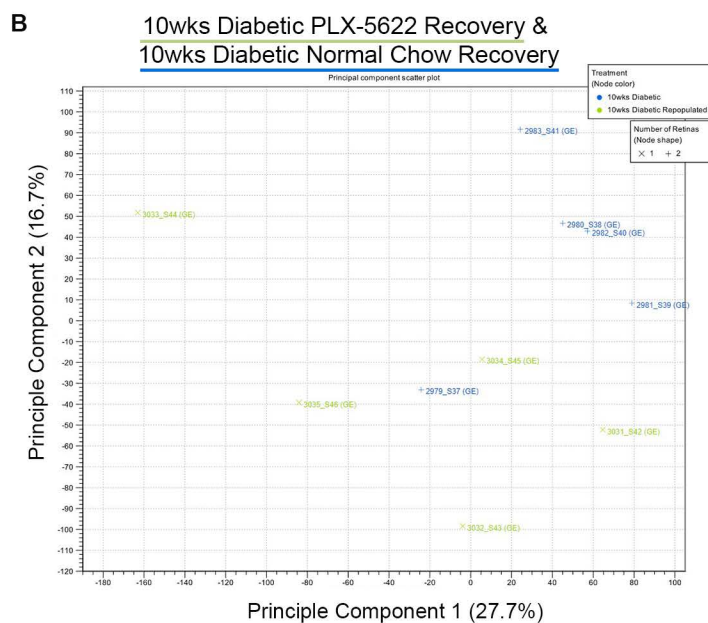

Supplement: MOESM1 [file 23826380]
